# Supplementary material for: A Novel Polysaccharide from Auricularia Auricula Alleviates Thrombosis Induced by Carrageenan in Mice
Source: MDPI journal article supplement (doi:10.3390/molecules27154831), 2022-07-28
Supplement: s1 [file s1]

**Table S1.** Effects of AAPs on FIB, APTT, PT and TT in vitro

| Sample         | Concentration<br>( $\mu\text{g/mL}$ ) | Clotting time (s)   |                     |                     |
|----------------|---------------------------------------|---------------------|---------------------|---------------------|
|                |                                       | APTT                | PT                  | TT                  |
| <i>Saline</i>  | -                                     | $28.0 \pm 0.2$      | $11.3 \pm 0.1$      | $17.7 \pm 0.1$      |
| <i>Heparin</i> | 2.5 IU/mL                             | $30.3 \pm 0.1^{**}$ | $13.6 \pm 0.5^{**}$ | $21.4 \pm 0.1^{**}$ |
|                | 25 IU/mL                              | > 200               | > 200               | > 200               |
| <i>AAP</i>     | 12.5                                  | $28.9 \pm 0.1^{**}$ | $11.8 \pm 0.1$      | $18.0 \pm 0.1^*$    |
|                | 25                                    | $31.3 \pm 0.3^{**}$ | $11.7 \pm 0.1$      | $22.3 \pm 0.3^{**}$ |
|                | 50                                    | $31.9 \pm 0.2^{**}$ | $11.0 \pm 0.2$      | $25.3 \pm 0.3^{**}$ |
| <i>AAP-a</i>   | 12.5                                  | $28.3 \pm 0.1$      | $11.4 \pm 0.2$      | $16.5 \pm 0.2$      |
|                | 25                                    | $28.4 \pm 0.1$      | $11.6 \pm 0.1$      | $16.3 \pm 0.1$      |
|                | 50                                    | $28.4 \pm 0.3$      | $11.5 \pm 0.2$      | $16.6 \pm 0.1$      |
| <i>AAP-b</i>   | 12.5                                  | $36.0 \pm 0.1^{**}$ | $11.4 \pm 0.2$      | $33.7 \pm 0.2^{**}$ |
|                | 25                                    | $48.4 \pm 0.3^{**}$ | $12.6 \pm 0.2^{**}$ | $42.4 \pm 0.2^{**}$ |
|                | 50                                    | $64.5 \pm 0.4^{**}$ | $13.7 \pm 0.3^{**}$ | $62.7 \pm 0.3^{**}$ |
| <i>AAP-c</i>   | 12.5                                  | $26.2 \pm 0.1$      | $16.2 \pm 0.2^{**}$ | $20.3 \pm 0.1^{**}$ |
|                | 25                                    | $27.5 \pm 0.1$      | $26.6 \pm 0.2^{**}$ | $21.8 \pm 0.2^{**}$ |
|                | 50                                    | $47.3 \pm 1.0^{**}$ | $63.6 \pm 0.3^{**}$ | $28.3 \pm 0.3^{**}$ |

\* $P < 0.05$  represents significant difference and \*\* $P < 0.01$  represents extreme significant difference.

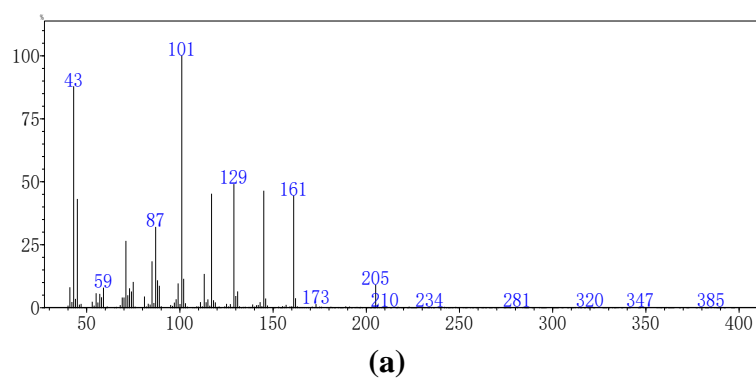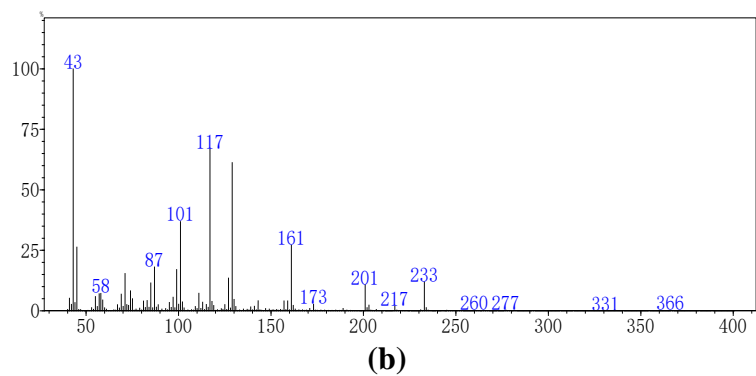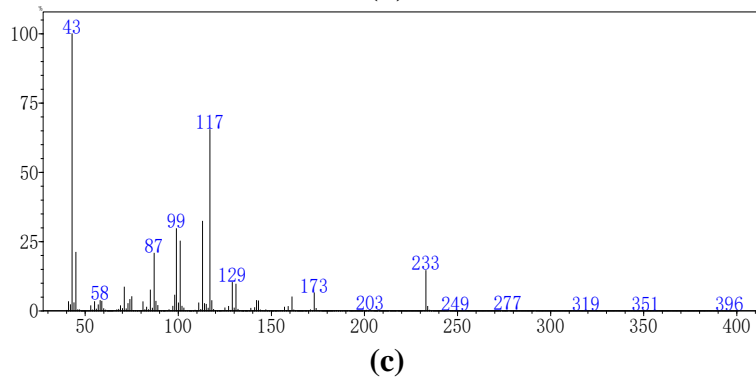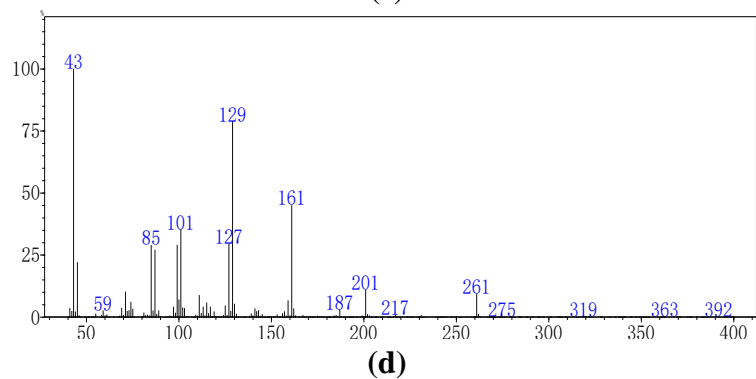

**Figure S1.** Mass spectra scanning of glycoside linkages of Man $p$ -(1 $\rightarrow$  (a),  $\rightarrow$ 3)-Man $p$ -(1 $\rightarrow$  (b),  $\rightarrow$ 4)-Glc $p$ -(1 $\rightarrow$  (c) and  $\rightarrow$ 2,3)-Man $p$ -(1 $\rightarrow$  (d).

## **Abbreviations**

*Auricularia auricula* polysaccharide, AAP; adenosine diphosphate, ADP; activated partial thromboplastin time, APTT; antithrombin III, AT-III; enzyme-linked immunosorbent assay, Elisa; endothelial nitric oxide synthases, eNOs; endothelin-1, ET-1; hematoxylin and eosin, H&E; high molecular weight kininogen, HMWK; inhibition rate of thrombus relative length, IR; protein C, PC; prostacyclin, PGI<sub>2</sub>; plasminogen, PLG; prothrombin time, PT; relative average tail length, RATL; tissue factor pathway inhibitor, TFPI; thrombin time, TT; thromboxane A<sub>2</sub>, TXA<sub>2</sub>; thromboxane B<sub>2</sub>, TXB<sub>2</sub>.
